# Supplementary material for: Transition from an indirect type-I to a direct type-II bandgap in α-tellurene/Ca(OH)2 heterostructures with excellent optical properties
Source: Royal Society of Chemistry journal article supplement (doi:10.1039/d0tc02741c), 2020-01-01
Supplement: d0tc02741c1.pdf [file d0tc02741c1.pdf]

## **Transition from Indirect Type-I to Direct Type-II Bandgaps in $\alpha$ -tellurene/Ca(OH)<sub>2</sub> Heterostructure with Superb Optical Properties**

Xiaolin Cai<sup>1, 2</sup>, Weiguang Chen<sup>3</sup>, Xingtao Jia<sup>1</sup>, Liwei Zhang<sup>1</sup>, Qin Wang<sup>1</sup>, Baoji Wang<sup>1</sup>, Xuefeng Yang<sup>1</sup>, Yujin Liu<sup>11</sup>, Yu Jia<sup>2, 4\*</sup>

*<sup>1</sup>School of Physics and Electronic Information Engineering, Henan Polytechnic University, Jiaozuo 454000, China*

*<sup>2</sup>Key Laboratory for Special Functional Materials of Ministry of Education, School of Physics and Electronics, Henan University, Kaifeng 475004, China*

*<sup>3</sup>School of Physics and Electrical Engineering, Zhengzhou Normal University, Zhengzhou 450044, China*

*<sup>4</sup>International Laboratory for Quantum Functional Materials of Henan, and School of Physics and Microelectronics, Zhengzhou University, Zhengzhou 450001, China*

---

\* Address correspondence to E-mail: wflyj@hpu.edu.cn.

\* Address correspondence to E-mail: jiayu@zzu.edu.cn.

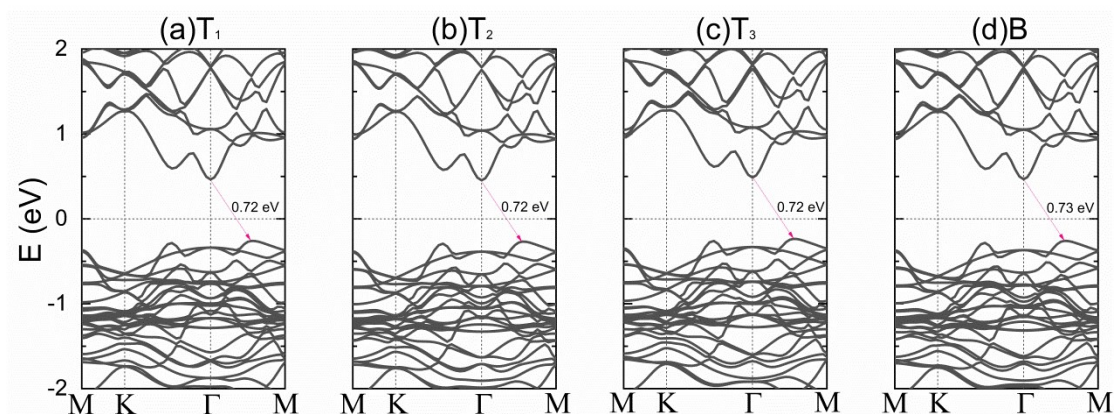

**Figure S1.** Band structures of the Te/Ca(OH)<sub>2</sub> bilayer with four different configurations by PBE functional. Here, the Fermi levels are set to zero.

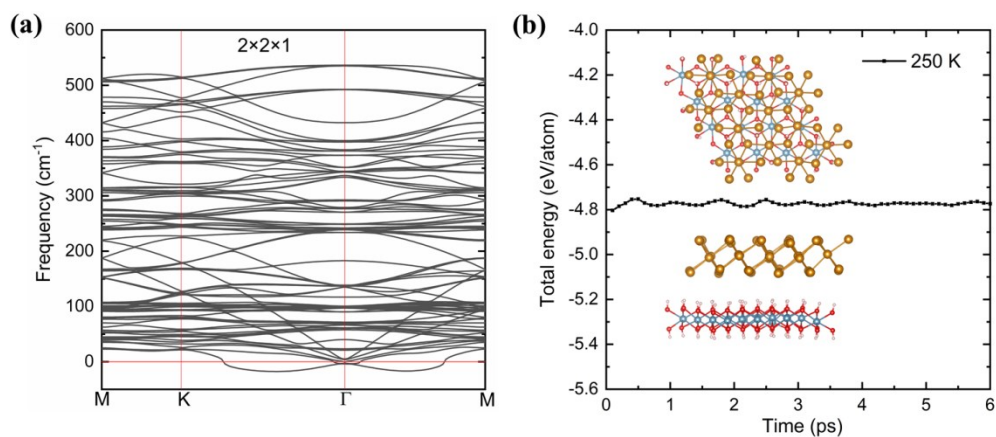

**Figure S2.** (a) Phonon dispersion spectra of the Te/Ca(OH)<sub>2</sub> vdWH for a 2×2×1 supercell, respectively. (b) Evolution of the average total energy per atom with time in the AIMD simulation. Thereinto, the insets are the top and side views of final structure obtained from the AIMD simulations.

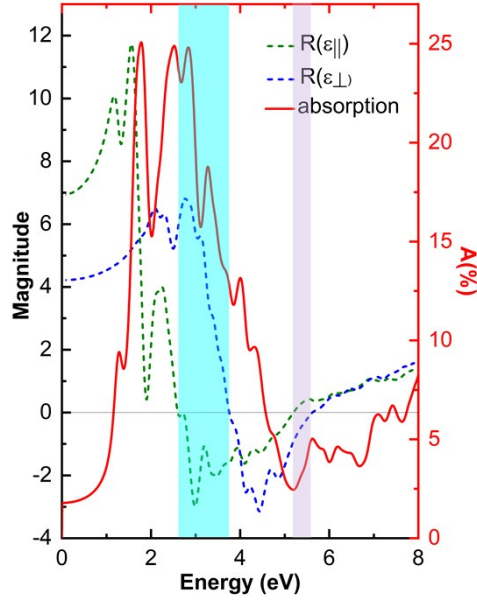

**Figure S3.** (a) Real parts of permittivity and (b) optical absorption of the Te/Ca(OH)<sub>2</sub> vdWH obtained from HSE06 functional.

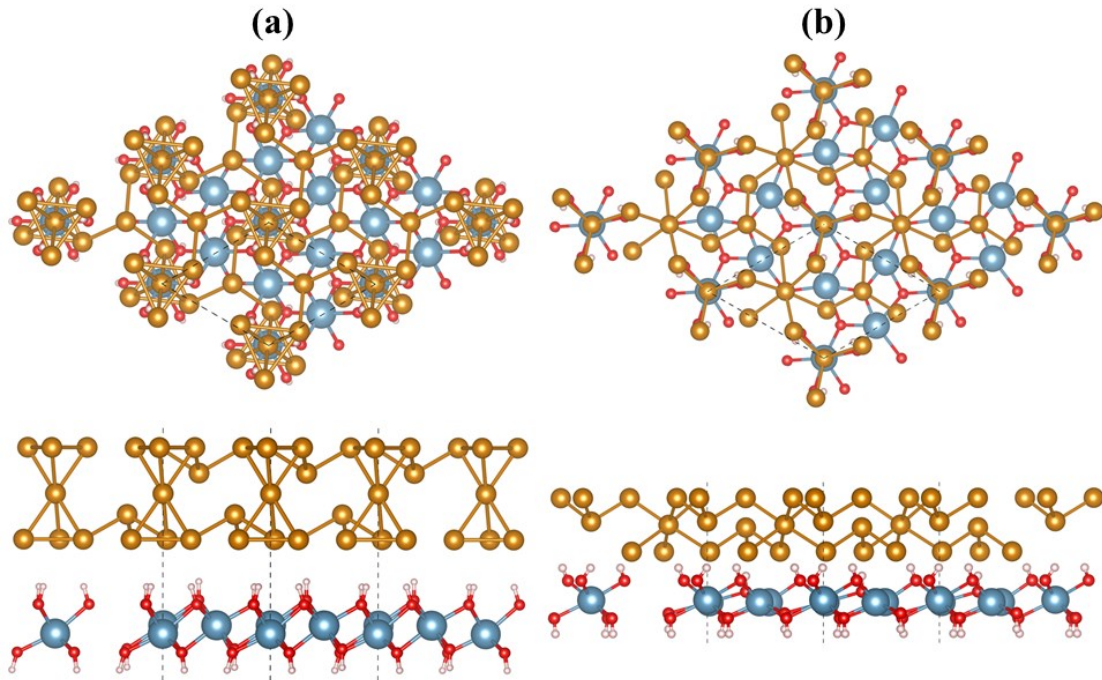

**Figure S4.** Top and side views of the crystal structures of the Te/Ca(OH)<sub>2</sub> heterobilayer under the applied strain of (a) -9% and (b) 14%, respectively.
